# Supplementary material for: Characterization of Pseudofusicoccum Species from Diseased Plantation-Grown Acacia mangium, Eucalyptus spp., and Pinus massoniana in Southern China
Source: MDPI journal article supplement (doi:10.3390/pathogens12040574), 2023-04-08
Supplement: s1 [file s1]

# Characterization of *Pseudofusicoccum* Species from Diseased Plantation-Grown *Acacia mangium*, *Eucalyptus* spp., and *Pinus massoniana* in Southern China

Guoqing Li, Wenxia Wu, Linqin Lu, Bingyin Chen and Shuaifei Chen\*

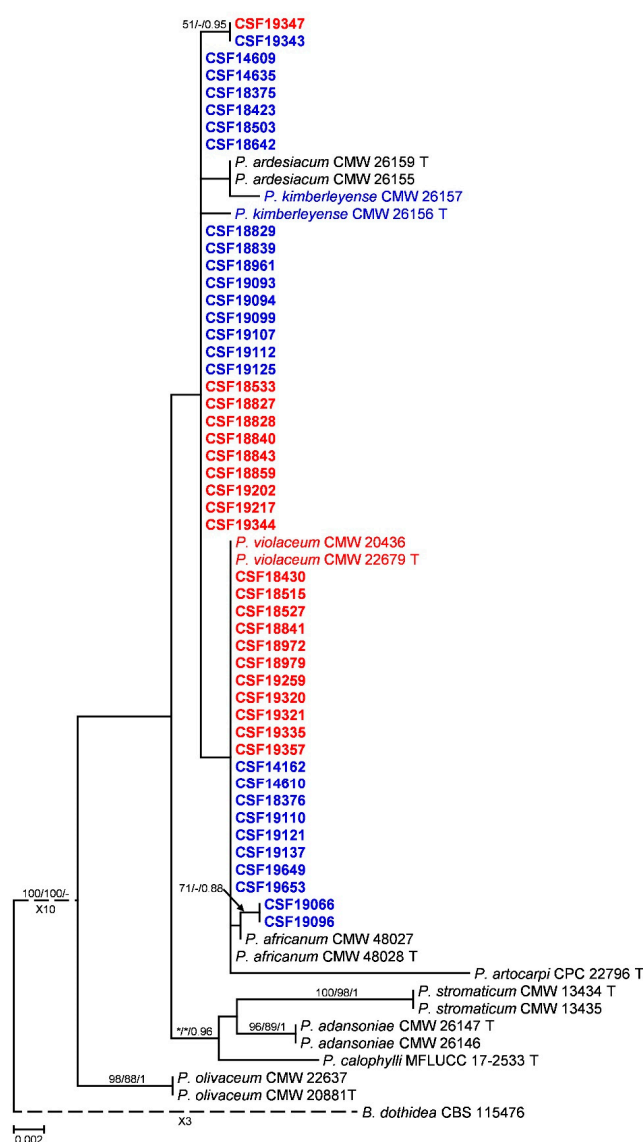

**Figure S1.** Phylogenetic tree based on maximum likelihood (ML) analyses of the ITS locus for *Pseudofusicoccum* species. Isolates in blue (*P. kimberleyense*) and red (*P. violaceum*) colors in bold were sequenced in this study. Bootstrap support values  $\geq 70\%$  for ML and MP (maximum parsimony) and probabilities values of BI (Bayesian inference)  $\geq 0.9$  are presented above the branches as follows: ML/MP/BI, bootstrap support values  $< 70\%$  and probabilities values  $< 0.9$  are marked with ‘\*’, and absent are marked with ‘-’. Ex-type isolates are marked with ‘T’. The trees were rooted in *Botryosphaeria dothidea* (CBS 115476).

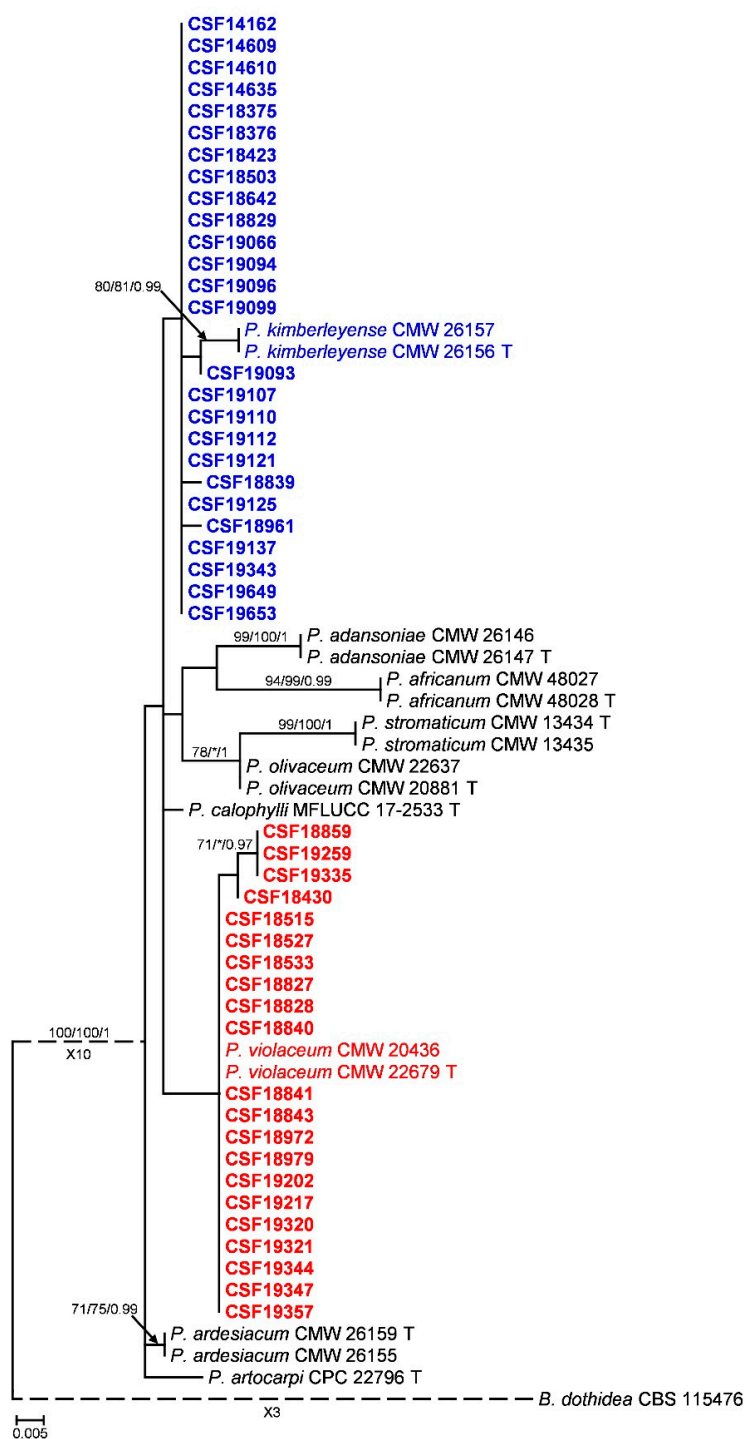

**Figure S2.** Phylogenetic tree based on maximum likelihood (ML) analyses the *tef1* locus for *Pseudofusicoccum* species. Isolates in blue (*P. kimberleyense*) and red (*P. violaceum*) colors in bold are sequenced in this study. Bootstrap support values  $\geq 70\%$  for ML and MP (maximum parsimony) and probabilities values of BI (Bayesian inference)  $\geq 0.9$  are presented above the branches as follows: ML/MP/BI, bootstrap support values  $< 70\%$  and probabilities values  $< 0.9$  are marked with '\*', and absent are marked with '-'. Ex-type isolates are marked with 'T'. The trees were rooted in *Botryosphaeria dothidea* (CBS 115476).

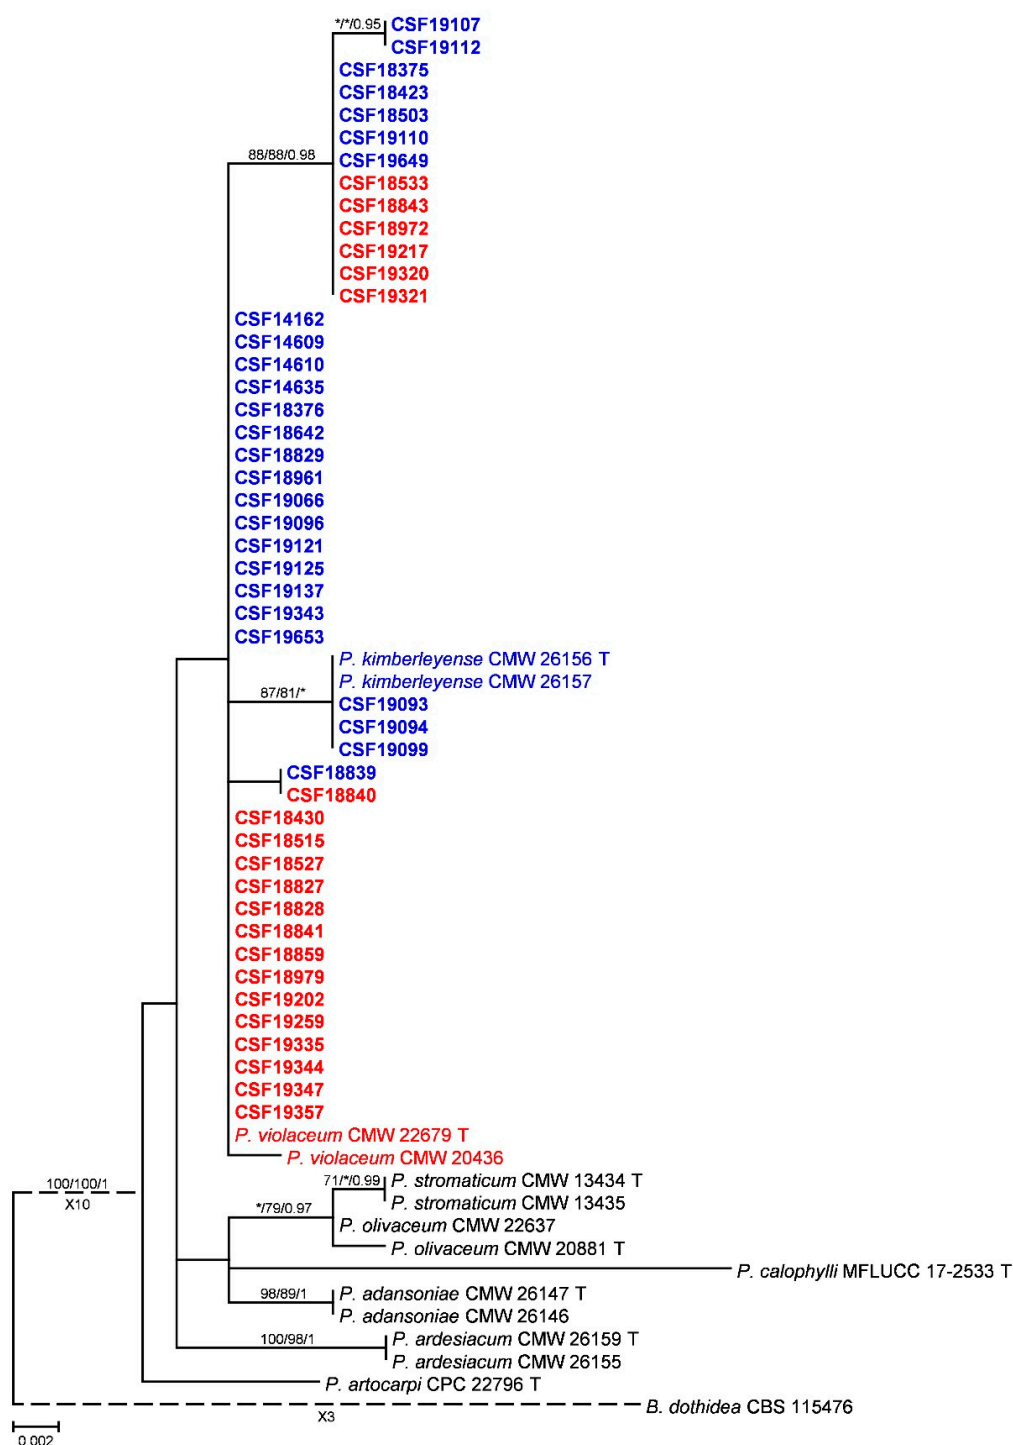

**Figure S3.** Phylogenetic tree based on maximum likelihood (ML) analyses the *tub2* locus for *Pseudofusicoccum* species. Isolates in blue (*P. kimberleyense*) and red (*P. violaceum*) colors in bold are sequenced in this study. Bootstrap support values  $\geq 70\%$  for ML and MP (maximum parsimony) and probabilities values of BI (Bayesian inference)  $\geq 0.9$  are presented above the branches as follows: ML/MP/BI, bootstrap support values  $< 70\%$  and probabilities values  $< 0.9$  are marked with '\*', and absent are marked with '-'. Ex-type isolates are marked with 'T'. The trees were rooted in *Botryosphaeria dothidea* (CBS 115476).
